# Supplementary material for: Relationship between Team Conflict and Performance in Green Enterprises: A Cross‐Level Model Moderated by Leaders’ Political Skills
Source: Hindawi journal article supplement (doi:10.1155/2021/6635426), 2021-01-01
Supplement: f1 [file 6635426.f1.zip]

Archive with 2 entries (2 files):
- 6635426.f1/Individual level data.pdf
- 6635426.f1/Team level data.pdf
