# Supplementary material for: Relationship between Team Conflict and Performance in Green Enterprises: A Cross‐Level Model Moderated by Leaders’ Political Skills
Source: Hindawi journal article supplement (doi:10.1155/2021/6635426), 2021-01-01
Supplement: f1 [file 6635426.f1.zip]

| ID | TRC  | TTC  | LPS  | TP | type | size |   |
|----|------|------|------|----|------|------|---|
| 1  | 2.77 | 2.88 | 4.00 |    | 3    | 1    | 3 |
| 2  | 1.97 | 3.08 | 4.00 |    | 4    | 3    | 3 |
| 3  | 2.12 | 3.50 | 4.00 |    | 4    | 3    | 2 |
| 4  | 1.37 | 3.67 | 5.00 |    | 3    | 5    | 4 |
| 5  | 1.97 | 3.57 | 4.00 |    | 4    | 5    | 2 |
| 6  | 1.66 | 3.63 | 5.00 |    | 3    | 1    | 3 |
| 7  | 3.75 | 4.00 | 2.00 |    | 4    | 4    | 4 |
| 8  | 2.70 | 2.90 | 4.00 |    | 4    | 3    | 3 |
| 9  | 2.75 | 2.88 | 3.00 |    | 4    | 5    | 3 |
| 10 | 1.62 | 3.50 | 4.00 |    | 4    | 4    | 2 |
| 11 | 2.75 | 2.67 | 4.00 |    | 3    | 5    | 4 |
| 12 | 3.44 | 2.83 | 3.00 |    | 4    | 3    | 4 |
| 13 | 2.33 | 2.67 | 4.00 |    | 4    | 5    | 3 |
| 14 | 3.75 | 2.11 | 3.00 |    | 3    | 1    | 4 |
| 15 | 2.92 | 3.67 | 4.00 |    | 3    | 4    | 4 |
| 16 | 2.39 | 2.90 | 4.00 |    | 4    | 1    | 2 |
| 17 | 2.12 | 3.50 | 4.00 |    | 4    | 5    | 3 |
| 18 | 3.54 | 2.78 | 3.00 |    | 4    | 5    | 3 |
| 19 | 4.00 | 1.56 | 3.00 |    | 1    | 3    | 3 |
| 20 | 2.75 | 2.67 | 4.00 |    | 3    | 1    | 4 |
| 21 | 2.94 | 4.00 | 3.00 |    | 4    | 1    | 3 |
| 22 | 1.75 | 3.67 | 5.00 |    | 3    | 1    | 4 |
| 23 | 2.15 | 3.73 | 5.00 |    | 3    | 5    | 3 |
| 24 | 2.71 | 2.83 | 3.00 |    | 4    | 2    | 4 |
| 25 | 3.40 | 2.07 | 3.00 |    | 3    | 4    | 3 |
| 26 | 2.58 | 3.00 | 3.00 |    | 4    | 5    | 4 |
| 27 | 2.87 | 2.07 | 2.00 |    | 5    | 5    | 1 |
| 28 | 2.25 | 3.38 | 5.00 |    | 3    | 3    | 3 |
| 29 | 2.08 | 3.78 | 4.00 |    | 4    | 1    | 2 |
| 30 | 2.79 | 2.72 | 3.00 |    | 4    | 5    | 4 |
| 31 | 2.69 | 3.92 | 3.00 |    | 4    | 3    | 4 |
| 32 | 1.75 | 3.44 | 5.00 |    | 3    | 5    | 4 |
| 33 | 4.00 | 4.00 | 2.00 |    | 2    | 5    | 3 |
| 34 | 2.75 | 2.17 | 4.00 |    | 3    | 3    | 3 |
| 35 | 3.87 | 2.33 | 2.00 |    | 3    | 3    | 4 |
| 36 | 2.37 | 3.50 | 3.00 |    | 4    | 3    | 2 |
| 37 | 2.00 | 3.50 | 3.00 |    | 5    | 5    | 1 |
| 38 | 3.12 | 2.83 | 3.00 |    | 3    | 5    | 3 |
| 39 | 3.75 | 2.00 | 2.00 |    | 3    | 5    | 3 |
| 40 | 3.25 | 4.00 | 3.00 |    | 3    | 5    | 3 |
| 41 | 2.75 | 4.00 | 3.00 |    | 4    | 5    | 3 |
| 42 | 1.40 | 3.73 | 5.00 |    | 4    | 5    | 3 |
| 43 | 1.67 | 3.33 | 5.00 |    | 3    | 5    | 4 |
| 44 | 3.12 | 3.07 | 4.00 |    | 3    | 5    | 3 |
| 45 | 2.83 | 2.89 | 3.00 |    | 4    | 5    | 4 |
| 46 | 2.42 | 3.41 | 3.00 |    | 4    | 4    | 4 |
| 47 | 2.19 | 3.41 | 3.00 |    | 4    | 5    | 4 |
| 48 | 1.86 | 3.52 | 4.00 |    | 4    | 5    | 2 |
| 49 | 1.46 | 3.89 | 3.00 |    | 4    | 5    | 2 |
| 50 | 3.75 | 2.50 | 2.00 |    | 4    | 5    | 3 |
| 51 | 3.15 | 2.40 | 3.00 |    | 4    | 5    | 3 |
| 52 | 1.75 | 3.22 | 4.00 |    | 4    | 5    | 3 |
| 53 | 4.00 | 2.56 | 3.00 |    | 2    | 1    | 4 |

|    |      |      |      |   |   |   |
|----|------|------|------|---|---|---|
| 54 | 2.21 | 3.11 | 5.00 | 3 | 1 | 2 |
| 55 | 2.17 | 3.72 | 2.00 | 5 | 5 | 2 |
| 56 | 1.37 | 3.50 | 5.00 | 3 | 5 | 1 |
| 57 | 1.25 | 4.00 | 3.00 | 4 | 2 | 4 |
| 58 | 3.12 | 2.25 | 3.00 | 4 | 5 | 4 |
| 59 | 1.87 | 4.33 | 3.00 | 5 | 5 | 1 |
| 60 | 1.20 | 4.20 | 4.00 | 5 | 5 | 1 |
| 61 | 1.83 | 3.44 | 3.00 | 4 | 5 | 2 |
| 62 | 1.50 | 3.50 | 3.00 | 5 | 5 | 3 |
| 63 | 1.20 | 5.00 | 5.00 | 4 | 5 | 2 |
| 64 | 2.21 | 3.43 | 4.00 | 3 | 5 | 1 |
| 65 | 2.62 | 3.08 | 4.00 | 3 | 5 | 4 |
| 66 | 1.95 | 3.20 | 5.00 | 3 | 3 | 2 |
| 67 | 2.59 | 2.96 | 4.00 | 3 | 5 | 2 |
| 68 | 1.91 | 3.50 | 5.00 | 3 | 5 | 2 |
| 69 | 2.59 | 3.00 | 4.00 | 3 | 5 | 3 |
| 70 | 1.91 | 3.47 | 5.00 | 3 | 5 | 2 |
| 71 | 2.77 | 2.15 | 4.00 | 3 | 1 | 3 |
| 72 | 1.97 | 2.35 | 4.00 | 4 | 3 | 3 |
| 73 | 2.12 | 3.75 | 4.00 | 4 | 3 | 2 |
| 74 | 1.37 | 4.00 | 5.00 | 3 | 5 | 4 |
| 75 | 1.97 | 5.00 | 4.00 | 4 | 5 | 2 |
| 76 | 1.66 | 5.00 | 5.00 | 3 | 1 | 3 |
| 77 | 3.75 | 4.80 | 2.00 | 4 | 4 | 4 |
| 78 | 2.70 | 2.80 | 4.00 | 4 | 3 | 3 |
| 79 | 2.75 | 2.75 | 3.00 | 4 | 5 | 3 |
| 80 | 1.62 | 3.75 | 4.00 | 4 | 4 | 2 |
| 81 | 2.75 | 2.00 | 4.00 | 3 | 5 | 4 |
| 82 | 3.44 | 2.20 | 3.00 | 4 | 3 | 4 |
| 83 | 2.33 | 2.00 | 4.00 | 4 | 5 | 3 |
| 84 | 3.75 | 2.00 | 3.00 | 3 | 1 | 4 |
| 85 | 2.92 | 5.00 | 4.00 | 3 | 4 | 4 |
