# Supplementary material for: Relationship between Team Conflict and Performance in Green Enterprises: A Cross‐Level Model Moderated by Leaders’ Political Skills
Source: Hindawi journal article supplement (doi:10.1155/2021/6635426), 2021-01-01
Supplement: f1 [file 6635426.f1.zip]

| ID | IP   | gender | tenure | education |
|----|------|--------|--------|-----------|
| 1  | 4.20 | 1.00   | 2.00   | 3.00      |
| 1  | 4.50 | 0.00   | 3.00   | 2.00      |
| 1  | 4.50 | 0.00   | 3.00   | 2.00      |
| 1  | 4.30 | 1.00   | 3.00   | 2.00      |
| 1  | 4.30 | 1.00   | 2.00   | 3.00      |
| 1  | 4.80 | 0.00   | 3.00   | 4.00      |
| 1  | 4.10 | 1.00   | 3.00   | 2.00      |
| 1  | 4.80 | 1.00   | 2.00   | 4.00      |
| 2  | 4.40 | 0.00   | 3.00   | 4.00      |
| 2  | 4.20 | 1.00   | 2.00   | 1.00      |
| 2  | 4.20 | 1.00   | 3.00   | 2.00      |
| 2  | 4.40 | 1.00   | 3.00   | 3.00      |
| 2  | 4.00 | 1.00   | 2.00   | 2.00      |
| 2  | 4.80 | 0.00   | 2.00   | 3.00      |
| 2  | 4.40 | 0.00   | 2.00   | 3.00      |
| 2  | 4.40 | 0.00   | 3.00   | 3.00      |
| 2  | 4.20 | 1.00   | 2.00   | 3.00      |
| 2  | 4.20 | 1.00   | 4.00   | 4.00      |
| 3  | 4.80 | 0.00   | 5.00   | 4.00      |
| 3  | 4.60 | 1.00   | 5.00   | 4.00      |
| 3  | 4.60 | 1.00   | 5.00   | 4.00      |
| 3  | 5.00 | 0.00   | 4.00   | 4.00      |
| 4  | 4.70 | 0.00   | 5.00   | 4.00      |
| 4  | 5.00 | 0.00   | 4.00   | 4.00      |
| 4  | 4.20 | 1.00   | 4.00   | 3.00      |
| 4  | 4.60 | 1.00   | 5.00   | 4.00      |
| 5  | 4.00 | 0.00   | 3.00   | 4.00      |
| 5  | 3.80 | 0.00   | 2.00   | 3.00      |
| 5  | 3.60 | 0.00   | 1.00   | 1.00      |
| 5  | 3.20 | 1.00   | 1.00   | 3.00      |
| 5  | 3.40 | 1.00   | 2.00   | 2.00      |
| 5  | 3.80 | 0.00   | 2.00   | 2.00      |
| 5  | 3.60 | 0.00   | 2.00   | 2.00      |
| 5  | 3.20 | 1.00   | 2.00   | 3.00      |
| 5  | 3.00 | 1.00   | 1.00   | 3.00      |
| 5  | 3.80 | 1.00   | 1.00   | 3.00      |
| 6  | 3.60 | 1.00   | 1.00   | 4.00      |
| 6  | 4.20 | 0.00   | 5.00   | 4.00      |
| 6  | 3.60 | 1.00   | 1.00   | 4.00      |
| 6  | 3.60 | 1.00   | 2.00   | 4.00      |
| 6  | 4.20 | 0.00   | 5.00   | 4.00      |
| 6  | 3.80 | 0.00   | 2.00   | 3.00      |
| 6  | 3.80 | 1.00   | 5.00   | 4.00      |
| 6  | 4.00 | 0.00   | 5.00   | 4.00      |
| 7  | 5.00 | 0.00   | 5.00   | 4.00      |
| 7  | 5.00 | 0.00   | 4.00   | 4.00      |
| 7  | 5.00 | 1.00   | 5.00   | 4.00      |
| 7  | 4.80 | 0.00   | 4.00   | 3.00      |
| 8  | 4.80 | 0.00   | 1.00   | 1.00      |
| 8  | 4.80 | 0.00   | 1.00   | 1.00      |
| 8  | 4.00 | 1.00   | 1.00   | 1.00      |
| 8  | 4.20 | 1.00   | 1.00   | 1.00      |
| 8  | 4.60 | 0.00   | 1.00   | 1.00      |

|    |      |      |      |      |
|----|------|------|------|------|
| 8  | 4.60 | 1.00 | 1.00 | 1.00 |
| 8  | 4.60 | 0.00 | 2.00 | 1.00 |
| 8  | 4.80 | 1.00 | 2.00 | 1.00 |
| 8  | 4.60 | 1.00 | 1.00 | 1.00 |
| 8  | 4.80 | 0.00 | 1.00 | 1.00 |
| 9  | 4.60 | 0.00 | 1.00 | 3.00 |
| 9  | 4.00 | 1.00 | 2.00 | 2.00 |
| 9  | 4.80 | 0.00 | 2.00 | 2.00 |
| 9  | 4.00 | 1.00 | 2.00 | 1.00 |
| 10 | 4.40 | 1.00 | 1.00 | 3.00 |
| 10 | 5.00 | 0.00 | 1.00 | 4.00 |
| 10 | 4.20 | 1.00 | 1.00 | 3.00 |
| 10 | 4.80 | 0.00 | 1.00 | 4.00 |
| 11 | 4.50 | 1.00 | 4.00 | 3.00 |
| 11 | 4.80 | 0.00 | 5.00 | 4.00 |
| 11 | 4.80 | 1.00 | 5.00 | 4.00 |
| 12 | 4.40 | 0.00 | 3.00 | 4.00 |
| 12 | 4.00 | 1.00 | 5.00 | 3.00 |
| 12 | 4.60 | 0.00 | 5.00 | 4.00 |
| 12 | 5.00 | 0.00 | 4.00 | 4.00 |
| 13 | 4.80 | 0.00 | 4.00 | 4.00 |
| 13 | 5.00 | 0.00 | 5.00 | 4.00 |
| 13 | 5.00 | 0.00 | 4.00 | 4.00 |
| 14 | 2.80 | 1.00 | 1.00 | 3.00 |
| 14 | 2.40 | 1.00 | 2.00 | 4.00 |
| 14 | 3.00 | 1.00 | 1.00 | 3.00 |
| 15 | 4.60 | 0.00 | 3.00 | 3.00 |
| 15 | 4.60 | 0.00 | 5.00 | 4.00 |
| 15 | 4.80 | 0.00 | 4.00 | 4.00 |
| 16 | 4.40 | 0.00 | 2.00 | 3.00 |
| 16 | 4.20 | 0.00 | 2.00 | 2.00 |
| 16 | 3.40 | 1.00 | 3.00 | 2.00 |
| 16 | 4.00 | 0.00 | 2.00 | 2.00 |
| 16 | 4.60 | 1.00 | 3.00 | 4.00 |
| 16 | 4.80 | 0.00 | 2.00 | 4.00 |
| 16 | 4.50 | 0.00 | 4.00 | 3.00 |
| 17 | 4.80 | 0.00 | 2.00 | 4.00 |
| 17 | 5.00 | 0.00 | 5.00 | 4.00 |
| 17 | 4.20 | 1.00 | 3.00 | 2.00 |
| 17 | 4.80 | 0.00 | 2.00 | 3.00 |
| 17 | 5.00 | 0.00 | 4.00 | 4.00 |
| 17 | 4.40 | 1.00 | 2.00 | 3.00 |
| 18 | 4.40 | 1.00 | 2.00 | 3.00 |
| 18 | 3.60 | 1.00 | 1.00 | 2.00 |
| 18 | 4.60 | 0.00 | 2.00 | 4.00 |
| 18 | 4.40 | 1.00 | 1.00 | 3.00 |
| 18 | 4.20 | 1.00 | 1.00 | 1.00 |
| 18 | 3.80 | 1.00 | 3.00 | 3.00 |
| 19 | 2.40 | 1.00 | 1.00 | 2.00 |
| 19 | 2.60 | 1.00 | 1.00 | 1.00 |
| 19 | 1.80 | 1.00 | 3.00 | 2.00 |
| 20 | 5.00 | 0.00 | 3.00 | 3.00 |
| 20 | 4.80 | 0.00 | 1.00 | 3.00 |
| 20 | 4.20 | 0.00 | 4.00 | 4.00 |

|    |      |      |      |      |
|----|------|------|------|------|
| 20 | 5.00 | 0.00 | 5.00 | 5.00 |
| 21 | 4.80 | 0.00 | 4.00 | 4.00 |
| 21 | 5.00 | 0.00 | 4.00 | 3.00 |
| 21 | 4.80 | 0.00 | 4.00 | 4.00 |
| 21 | 5.00 | 0.00 | 4.00 | 4.00 |
| 22 | 5.00 | 0.00 | 4.00 | 4.00 |
| 22 | 5.00 | 0.00 | 5.00 | 4.00 |
| 22 | 4.40 | 1.00 | 4.00 | 4.00 |
| 23 | 2.80 | 1.00 | 1.00 | 1.00 |
| 23 | 3.00 | 1.00 | 1.00 | 2.00 |
| 23 | 4.00 | 1.00 | 1.00 | 3.00 |
| 23 | 4.00 | 1.00 | 1.00 | 2.00 |
| 23 | 4.00 | 1.00 | 2.00 | 3.00 |
| 24 | 4.80 | 0.00 | 5.00 | 4.00 |
| 24 | 5.00 | 0.00 | 5.00 | 4.00 |
| 24 | 4.60 | 0.00 | 4.00 | 4.00 |
| 25 | 4.80 | 0.00 | 4.00 | 3.00 |
| 25 | 4.80 | 0.00 | 4.00 | 3.00 |
| 25 | 5.00 | 0.00 | 3.00 | 4.00 |
| 26 | 4.80 | 0.00 | 5.00 | 4.00 |
| 26 | 4.80 | 0.00 | 3.00 | 1.00 |
| 26 | 4.60 | 0.00 | 4.00 | 3.00 |
| 26 | 4.40 | 1.00 | 3.00 | 2.00 |
| 26 | 5.00 | 0.00 | 5.00 | 4.00 |
| 27 | 4.60 | 0.00 | 2.00 | 4.00 |
| 27 | 4.50 | 1.00 | 2.00 | 3.00 |
| 27 | 4.40 | 1.00 | 3.00 | 3.00 |
| 28 | 4.40 | 0.00 | 4.00 | 3.00 |
| 28 | 4.60 | 0.00 | 4.00 | 4.00 |
| 28 | 4.80 | 0.00 | 4.00 | 3.00 |
| 28 | 4.80 | 0.00 | 4.00 | 3.00 |
| 28 | 4.60 | 1.00 | 3.00 | 3.00 |
| 28 | 4.80 | 0.00 | 5.00 | 4.00 |
| 28 | 4.80 | 0.00 | 3.00 | 3.00 |
| 28 | 4.80 | 0.00 | 3.00 | 3.00 |
| 28 | 4.80 | 0.00 | 5.00 | 4.00 |
| 28 | 4.40 | 1.00 | 3.00 | 3.00 |
| 29 | 5.00 | 0.00 | 4.00 | 3.00 |
| 29 | 5.00 | 0.00 | 3.00 | 3.00 |
| 29 | 4.80 | 0.00 | 5.00 | 4.00 |
| 29 | 4.80 | 0.00 | 4.00 | 3.00 |
| 29 | 4.80 | 0.00 | 3.00 | 3.00 |
| 29 | 4.60 | 1.00 | 5.00 | 5.00 |
| 29 | 4.60 | 0.00 | 4.00 | 4.00 |
| 29 | 4.80 | 0.00 | 4.00 | 3.00 |
| 30 | 5.00 | 0.00 | 4.00 | 3.00 |
| 30 | 5.00 | 0.00 | 4.00 | 4.00 |
| 30 | 4.80 | 0.00 | 4.00 | 3.00 |
| 31 | 4.80 | 0.00 | 5.00 | 4.00 |
| 31 | 4.60 | 1.00 | 5.00 | 4.00 |
| 31 | 4.60 | 1.00 | 4.00 | 4.00 |
| 32 | 4.40 | 1.00 | 4.00 | 3.00 |
| 32 | 5.00 | 0.00 | 5.00 | 4.00 |
| 32 | 4.80 | 0.00 | 4.00 | 4.00 |

|    |      |      |      |      |
|----|------|------|------|------|
| 33 | 5.00 | 0.00 | 4.00 | 4.00 |
| 33 | 4.80 | 1.00 | 4.00 | 4.00 |
| 33 | 4.60 | 1.00 | 4.00 | 4.00 |
| 33 | 4.20 | 1.00 | 5.00 | 4.00 |
| 34 | 4.00 | 1.00 | 5.00 | 4.00 |
| 34 | 4.80 | 0.00 | 3.00 | 2.00 |
| 34 | 4.60 | 1.00 | 4.00 | 3.00 |
| 35 | 4.20 | 1.00 | 3.00 | 2.00 |
| 35 | 4.60 | 1.00 | 3.00 | 1.00 |
| 35 | 4.40 | 1.00 | 3.00 | 2.00 |
| 36 | 4.20 | 1.00 | 4.00 | 4.00 |
| 36 | 5.00 | 0.00 | 5.00 | 4.00 |
| 36 | 4.80 | 0.00 | 4.00 | 4.00 |
| 36 | 4.60 | 1.00 | 4.00 | 4.00 |
| 37 | 4.50 | 0.00 | 3.00 | 2.00 |
| 37 | 4.20 | 0.00 | 2.00 | 3.00 |
| 37 | 4.60 | 1.00 | 4.00 | 2.00 |
| 37 | 4.80 | 0.00 | 2.00 | 4.00 |
| 38 | 4.50 | 1.00 | 2.00 | 3.00 |
| 38 | 4.20 | 1.00 | 2.00 | 2.00 |
| 39 | 4.40 | 1.00 | 1.00 | 2.00 |
| 39 | 4.60 | 0.00 | 1.00 | 4.00 |
| 40 | 5.00 | 0.00 | 4.00 | 4.00 |
| 40 | 4.80 | 0.00 | 5.00 | 5.00 |
| 41 | 4.80 | 0.00 | 2.00 | 3.00 |
| 41 | 5.00 | 0.00 | 5.00 | 2.00 |
| 42 | 4.60 | 0.00 | 5.00 | 4.00 |
| 42 | 4.80 | 0.00 | 4.00 | 4.00 |
| 42 | 4.80 | 0.00 | 4.00 | 3.00 |
| 42 | 4.80 | 0.00 | 4.00 | 3.00 |
| 42 | 4.80 | 0.00 | 4.00 | 4.00 |
| 43 | 4.60 | 1.00 | 2.00 | 3.00 |
| 43 | 4.40 | 1.00 | 3.00 | 2.00 |
| 43 | 4.80 | 1.00 | 2.00 | 4.00 |
| 43 | 4.20 | 1.00 | 1.00 | 2.00 |
| 44 | 3.20 | 1.00 | 1.00 | 2.00 |
| 44 | 4.00 | 0.00 | 1.00 | 2.00 |
| 44 | 4.00 | 1.00 | 1.00 | 1.00 |
| 44 | 3.60 | 1.00 | 1.00 | 1.00 |
| 44 | 3.80 | 1.00 | 2.00 | 1.00 |
| 45 | 4.80 | 1.00 | 4.00 | 3.00 |
| 45 | 4.60 | 1.00 | 5.00 | 4.00 |
| 45 | 4.80 | 1.00 | 5.00 | 4.00 |
| 46 | 4.00 | 0.00 | 1.00 | 3.00 |
| 46 | 3.60 | 1.00 | 2.00 | 3.00 |
| 46 | 3.60 | 1.00 | 3.00 | 2.00 |
| 46 | 4.00 | 0.00 | 1.00 | 4.00 |
| 46 | 4.20 | 0.00 | 2.00 | 3.00 |
| 46 | 4.00 | 0.00 | 2.00 | 2.00 |
| 46 | 3.80 | 1.00 | 1.00 | 3.00 |
| 46 | 4.00 | 0.00 | 4.00 | 4.00 |
| 46 | 4.20 | 0.00 | 2.00 | 4.00 |
| 46 | 4.20 | 0.00 | 2.00 | 3.00 |
| 47 | 4.20 | 0.00 | 2.00 | 2.00 |

|    |      |      |      |      |
|----|------|------|------|------|
| 47 | 4.50 | 0.00 | 3.00 | 2.00 |
| 47 | 4.60 | 1.00 | 1.00 | 2.00 |
| 48 | 4.80 | 0.00 | 2.00 | 2.00 |
| 48 | 4.00 | 1.00 | 1.00 | 2.00 |
| 48 | 4.40 | 0.00 | 2.00 | 3.00 |
| 48 | 5.00 | 0.00 | 4.00 | 4.00 |
| 48 | 4.50 | 1.00 | 1.00 | 3.00 |
| 48 | 4.50 | 1.00 | 1.00 | 1.00 |
| 48 | 4.40 | 1.00 | 4.00 | 2.00 |
| 48 | 4.20 | 0.00 | 2.00 | 2.00 |
| 48 | 4.60 | 1.00 | 2.00 | 2.00 |
| 49 | 3.60 | 0.00 | 1.00 | 2.00 |
| 49 | 3.60 | 0.00 | 1.00 | 2.00 |
| 49 | 4.00 | 1.00 | 3.00 | 1.00 |
| 49 | 4.20 | 0.00 | 1.00 | 1.00 |
| 49 | 4.40 | 1.00 | 1.00 | 1.00 |
| 49 | 3.80 | 1.00 | 1.00 | 2.00 |
| 49 | 4.60 | 1.00 | 3.00 | 3.00 |
| 49 | 4.00 | 1.00 | 2.00 | 2.00 |
| 49 | 4.40 | 1.00 | 3.00 | 3.00 |
| 50 | 4.80 | 0.00 | 3.00 | 3.00 |
| 50 | 5.00 | 0.00 | 4.00 | 3.00 |
| 50 | 4.60 | 1.00 | 4.00 | 3.00 |
| 50 | 4.80 | 0.00 | 3.00 | 3.00 |
| 50 | 4.80 | 0.00 | 4.00 | 3.00 |
| 50 | 4.60 | 0.00 | 3.00 | 2.00 |
| 50 | 4.40 | 1.00 | 2.00 | 3.00 |
| 51 | 4.60 | 0.00 | 2.00 | 2.00 |
| 51 | 4.40 | 1.00 | 2.00 | 2.00 |
| 51 | 4.80 | 0.00 | 2.00 | 3.00 |
| 51 | 5.00 | 0.00 | 4.00 | 4.00 |
| 51 | 4.20 | 1.00 | 3.00 | 3.00 |
| 51 | 4.80 | 0.00 | 3.00 | 2.00 |
| 52 | 4.40 | 1.00 | 1.00 | 3.00 |
| 52 | 4.40 | 1.00 | 2.00 | 3.00 |
| 53 | 4.60 | 0.00 | 1.00 | 2.00 |
| 53 | 4.80 | 0.00 | 3.00 | 3.00 |
| 53 | 5.00 | 0.00 | 4.00 | 4.00 |
| 53 | 4.80 | 1.00 | 2.00 | 3.00 |
| 53 | 5.00 | 0.00 | 3.00 | 2.00 |
| 54 | 4.20 | 1.00 | 2.00 | 2.00 |
| 54 | 4.40 | 1.00 | 3.00 | 2.00 |
| 54 | 4.20 | 1.00 | 1.00 | 3.00 |
| 55 | 3.80 | 1.00 | 1.00 | 1.00 |
| 55 | 4.60 | 0.00 | 1.00 | 2.00 |
| 55 | 5.00 | 0.00 | 4.00 | 4.00 |
| 56 | 4.50 | 0.00 | 1.00 | 3.00 |
| 56 | 4.60 | 0.00 | 1.00 | 2.00 |
| 56 | 4.80 | 0.00 | 4.00 | 3.00 |
| 56 | 4.20 | 1.00 | 1.00 | 2.00 |
| 56 | 4.80 | 0.00 | 4.00 | 2.00 |
| 56 | 4.20 | 1.00 | 3.00 | 2.00 |
| 57 | 4.80 | 0.00 | 3.00 | 4.00 |
| 57 | 4.40 | 1.00 | 2.00 | 2.00 |

|    |      |      |      |      |
|----|------|------|------|------|
| 57 | 4.80 | 1.00 | 3.00 | 2.00 |
| 57 | 4.50 | 0.00 | 3.00 | 3.00 |
| 57 | 4.20 | 1.00 | 1.00 | 1.00 |
| 57 | 4.20 | 0.00 | 3.00 | 1.00 |
| 58 | 4.00 | 1.00 | 2.00 | 3.00 |
| 58 | 4.00 | 1.00 | 2.00 | 2.00 |
| 59 | 4.50 | 1.00 | 1.00 | 1.00 |
| 59 | 4.80 | 0.00 | 3.00 | 1.00 |
| 59 | 4.20 | 1.00 | 1.00 | 3.00 |
| 60 | 4.60 | 1.00 | 4.00 | 2.00 |
| 60 | 4.80 | 0.00 | 5.00 | 1.00 |
| 60 | 4.50 | 1.00 | 3.00 | 1.00 |
| 60 | 4.80 | 0.00 | 4.00 | 2.00 |
| 61 | 5.00 | 0.00 | 5.00 | 2.00 |
| 61 | 5.00 | 0.00 | 5.00 | 1.00 |
| 62 | 4.50 | 1.00 | 3.00 | 1.00 |
| 62 | 4.80 | 0.00 | 4.00 | 1.00 |
| 62 | 4.60 | 0.00 | 3.00 | 1.00 |
| 62 | 4.50 | 1.00 | 2.00 | 2.00 |
| 62 | 4.50 | 1.00 | 2.00 | 2.00 |
| 63 | 4.60 | 1.00 | 4.00 | 3.00 |
| 63 | 4.60 | 1.00 | 5.00 | 3.00 |
| 63 | 4.80 | 0.00 | 4.00 | 2.00 |
| 64 | 4.00 | 1.00 | 2.00 | 2.00 |
| 64 | 3.20 | 1.00 | 1.00 | 3.00 |
| 65 | 5.00 | 0.00 | 5.00 | 1.00 |
| 65 | 4.60 | 0.00 | 4.00 | 4.00 |
| 66 | 2.00 | 1.00 | 1.00 | 2.00 |
| 66 | 3.00 | 1.00 | 1.00 | 2.00 |
| 66 | 4.67 | 0.00 | 4.00 | 2.00 |
| 66 | 4.30 | 1.00 | 4.00 | 2.00 |
| 66 | 4.80 | 0.00 | 5.00 | 2.00 |
| 66 | 4.60 | 0.00 | 2.00 | 4.00 |
| 66 | 4.30 | 1.00 | 5.00 | 3.00 |
| 67 | 4.00 | 1.00 | 2.00 | 2.00 |
| 67 | 4.60 | 1.00 | 2.00 | 3.00 |
| 67 | 4.80 | 0.00 | 5.00 | 2.00 |
| 67 | 4.50 | 0.00 | 4.00 | 3.00 |
| 67 | 4.60 | 1.00 | 3.00 | 2.00 |
| 67 | 4.80 | 0.00 | 5.00 | 2.00 |
| 67 | 4.60 | 0.00 | 3.00 | 2.00 |
| 67 | 4.20 | 1.00 | 2.00 | 3.00 |
| 68 | 5.00 | 1.00 | 2.00 | 3.00 |
| 68 | 4.80 | 0.00 | 2.00 | 2.00 |
| 68 | 5.00 | 0.00 | 4.00 | 3.00 |
| 68 | 5.00 | 0.00 | 5.00 | 3.00 |
| 68 | 5.00 | 0.00 | 3.00 | 3.00 |
| 69 | 5.00 | 0.00 | 4.00 | 3.00 |
| 69 | 5.00 | 0.00 | 4.00 | 3.00 |
| 69 | 4.80 | 0.00 | 5.00 | 4.00 |
| 69 | 4.60 | 1.00 | 3.00 | 2.00 |
| 69 | 5.00 | 0.00 | 4.00 | 3.00 |
| 69 | 4.80 | 0.00 | 4.00 | 3.00 |
| 69 | 4.60 | 1.00 | 3.00 | 2.00 |

|    |      |      |      |      |
|----|------|------|------|------|
| 69 | 4.60 | 1.00 | 5.00 | 5.00 |
| 70 | 5.00 | 0.00 | 3.00 | 2.00 |
| 70 | 5.00 | 0.00 | 4.00 | 3.00 |
| 70 | 4.50 | 1.00 | 4.00 | 4.00 |
| 70 | 4.80 | 1.00 | 5.00 | 5.00 |
| 70 | 4.80 | 0.00 | 5.00 | 4.00 |
| 70 | 4.60 | 1.00 | 4.00 | 4.00 |
| 70 | 5.00 | 0.00 | 4.00 | 3.00 |
| 70 | 5.00 | 0.00 | 3.00 | 3.00 |
| 71 | 4.20 | 1.00 | 2.00 | 3.00 |
| 71 | 4.50 | 0.00 | 3.00 | 2.00 |
| 71 | 4.50 | 0.00 | 3.00 | 2.00 |
| 71 | 4.30 | 1.00 | 3.00 | 2.00 |
| 71 | 4.30 | 1.00 | 2.00 | 3.00 |
| 71 | 4.80 | 0.00 | 3.00 | 4.00 |
| 71 | 4.10 | 1.00 | 3.00 | 2.00 |
| 71 | 4.80 | 1.00 | 2.00 | 4.00 |
| 72 | 4.40 | 0.00 | 3.00 | 4.00 |
| 72 | 4.20 | 1.00 | 2.00 | 1.00 |
| 72 | 4.20 | 1.00 | 3.00 | 2.00 |
| 72 | 4.40 | 1.00 | 3.00 | 3.00 |
| 72 | 4.00 | 1.00 | 2.00 | 2.00 |
| 72 | 4.80 | 0.00 | 2.00 | 3.00 |
| 72 | 4.40 | 0.00 | 2.00 | 3.00 |
| 72 | 4.40 | 0.00 | 3.00 | 3.00 |
| 72 | 4.20 | 1.00 | 2.00 | 3.00 |
| 72 | 4.20 | 1.00 | 4.00 | 4.00 |
| 73 | 4.80 | 0.00 | 5.00 | 4.00 |
| 73 | 4.60 | 1.00 | 5.00 | 4.00 |
| 73 | 4.60 | 1.00 | 5.00 | 4.00 |
| 73 | 5.00 | 0.00 | 4.00 | 4.00 |
| 74 | 4.70 | 0.00 | 5.00 | 4.00 |
| 74 | 5.00 | 0.00 | 4.00 | 4.00 |
| 74 | 4.20 | 1.00 | 4.00 | 3.00 |
| 74 | 4.60 | 1.00 | 5.00 | 4.00 |
| 75 | 4.00 | 0.00 | 3.00 | 4.00 |
| 75 | 3.80 | 0.00 | 2.00 | 3.00 |
| 75 | 3.60 | 0.00 | 1.00 | 1.00 |
| 75 | 3.20 | 1.00 | 1.00 | 3.00 |
| 75 | 3.40 | 1.00 | 2.00 | 2.00 |
| 75 | 3.80 | 0.00 | 2.00 | 2.00 |
| 75 | 3.60 | 0.00 | 2.00 | 2.00 |
| 75 | 3.20 | 1.00 | 2.00 | 3.00 |
| 75 | 3.00 | 1.00 | 1.00 | 3.00 |
| 75 | 3.80 | 1.00 | 1.00 | 3.00 |
| 76 | 3.60 | 1.00 | 1.00 | 4.00 |
| 76 | 4.20 | 0.00 | 5.00 | 4.00 |
| 76 | 3.60 | 1.00 | 1.00 | 4.00 |
| 76 | 3.60 | 1.00 | 2.00 | 4.00 |
| 76 | 4.20 | 0.00 | 5.00 | 4.00 |
| 76 | 3.80 | 0.00 | 2.00 | 3.00 |
| 76 | 3.80 | 1.00 | 5.00 | 4.00 |
| 76 | 4.00 | 0.00 | 5.00 | 4.00 |
| 77 | 5.00 | 0.00 | 5.00 | 4.00 |

|    |      |      |      |      |
|----|------|------|------|------|
| 77 | 5.00 | 0.00 | 4.00 | 4.00 |
| 77 | 5.00 | 1.00 | 5.00 | 4.00 |
| 77 | 4.80 | 0.00 | 4.00 | 3.00 |
| 78 | 4.80 | 0.00 | 1.00 | 1.00 |
| 78 | 4.80 | 0.00 | 1.00 | 1.00 |
| 78 | 4.00 | 1.00 | 1.00 | 1.00 |
| 78 | 4.20 | 1.00 | 1.00 | 1.00 |
| 78 | 4.60 | 0.00 | 1.00 | 1.00 |
| 78 | 4.60 | 1.00 | 1.00 | 1.00 |
| 78 | 4.60 | 0.00 | 2.00 | 1.00 |
| 78 | 4.80 | 1.00 | 2.00 | 1.00 |
| 78 | 4.60 | 1.00 | 1.00 | 1.00 |
| 78 | 4.80 | 0.00 | 1.00 | 1.00 |
| 79 | 4.60 | 0.00 | 1.00 | 3.00 |
| 79 | 4.00 | 1.00 | 2.00 | 2.00 |
| 79 | 4.80 | 0.00 | 2.00 | 2.00 |
| 79 | 4.00 | 1.00 | 2.00 | 1.00 |
| 80 | 4.40 | 1.00 | 1.00 | 3.00 |
| 80 | 5.00 | 0.00 | 1.00 | 4.00 |
| 80 | 4.20 | 1.00 | 1.00 | 3.00 |
| 80 | 4.80 | 0.00 | 1.00 | 4.00 |
| 81 | 4.50 | 1.00 | 4.00 | 3.00 |
| 81 | 4.80 | 0.00 | 5.00 | 4.00 |
| 81 | 4.80 | 1.00 | 5.00 | 4.00 |
| 82 | 4.40 | 0.00 | 3.00 | 4.00 |
| 82 | 4.00 | 1.00 | 5.00 | 3.00 |
| 82 | 4.60 | 0.00 | 5.00 | 4.00 |
| 82 | 5.00 | 0.00 | 4.00 | 4.00 |
| 83 | 4.80 | 0.00 | 4.00 | 4.00 |
| 83 | 5.00 | 0.00 | 5.00 | 4.00 |
| 83 | 5.00 | 0.00 | 4.00 | 4.00 |
| 84 | 2.80 | 1.00 | 1.00 | 3.00 |
| 84 | 2.40 | 1.00 | 2.00 | 4.00 |
| 84 | 3.00 | 1.00 | 1.00 | 3.00 |
| 85 | 4.60 | 0.00 | 3.00 | 3.00 |
| 85 | 4.60 | 0.00 | 5.00 | 4.00 |
| 85 | 4.80 | 0.00 | 4.00 | 4.00 |
